# Supplementary material for: Ethosuximide ameliorates neurodegenerative disease phenotypes by modulating DAF-16/FOXO target gene expression
Source: PubMed Central journal article supplement (PMC4587861; doi:10.1186/s13024-015-0046-3), 2015-09-29
Supplement: 13024_2015_46_MOESM16_ESM.pdf [file 13024_2015_46_MOESM16_ESM.pdf]

| Strain | Relevant genotype                                                                          | Source       |
|--------|--------------------------------------------------------------------------------------------|--------------|
| N2     | <i>C. elegans</i> wild type var. Bristol                                                   | CGC          |
| RM2754 | <i>dnj-14(ok237)X</i>                                                                      | CGC          |
| JD21   | <i>cca-1(ad1650)X</i>                                                                      | CGC          |
| TM3223 | <i>dnj-14(tm3223)X</i>                                                                     | S. Mitani    |
| CZ1200 | <i>lin-15(n756)X; juls76[P<sub>unc-25</sub>::GFP + lin-15(+)]</i>                          | B.C. Kraemer |
| CK10   | <i>bkls10 [P<sub>aex-3</sub>::h4R1N TauV337M + P<sub>myo-2</sub>::GFP]</i>                 | B.C. Kraemer |
| AMG119 | <i>cca-1(ad1650)X; bkls10 [P<sub>aex-3</sub>::h4R1N TauV337M + P<sub>myo-2</sub>::GFP]</i> | X. Chen      |

**Table S2: *C. elegans* strains used in this study**
