# Supplementary material for: Ethosuximide ameliorates neurodegenerative disease phenotypes by modulating DAF-16/FOXO target gene expression
Source: Springer Nature journal article supplement (doi:10.1186/s13024-015-0046-3), 2015-09-29
Supplement: MOESM1 [file 9776494]

| Strains                             | Drug treatments <sup>Δ</sup> (mg/ml) | Mean lifespan ± S.E.M (days) | % Change in mean lifespan <sup>§</sup> | p-value          | 75% mortality (days) | 90% mortality (days) | Maximum (days) | Total number of worms analysed |
|-------------------------------------|--------------------------------------|------------------------------|----------------------------------------|------------------|----------------------|----------------------|----------------|--------------------------------|
| N2                                  | PBS control                          | 19.69 ± 1.05                 | -                                      | -                | 27                   | 29                   | 31             | 53                             |
|                                     | Juglone (40 μM)                      | 16.43 ± 0.55**               | -16.56%                                | 0.0021           | 18 <sup>†††</sup>    | 23 <sup>†</sup>      | 25             | 52                             |
|                                     | Succinimide (1)                      | 15.91 ± 0.57**               | -19.20%                                | 0.0003           | 18 <sup>†††</sup>    | 21 <sup>†</sup>      | 25             | 52                             |
|                                     | Ethosuximide (1)                     | 20.39 ± 1.02                 | 3.56%                                  | 0.3966           | 27                   | 29                   | 33             | 54                             |
|                                     | PBS control                          | 18.55 ± 0.64                 | -                                      | -                | 22                   | 24                   | 25             | 52                             |
|                                     | Ethosuximide (2)                     | 18.79 ± 1.06                 | 1.29%                                  | 0.5061           | 24                   | 25                   | 29             | 52                             |
| N2; <i>L4440</i> (RNAi)             | Ethosuximide (4)                     | 17.12 ± 0.98                 | -7.71%                                 | 0.5000           | 21                   | 23                   | 26             | 52                             |
|                                     | PBS control                          | 19.48 ± 0.30                 | -                                      | -                | 22                   | 25                   | 27             | 131                            |
| N2; <i>hsp-1</i> (RNAi)             | Ethosuximide (1)                     | 19.08 ± 0.38                 | -2.05%                                 | 0.9164           | 22                   | 25                   | 27             | 130                            |
|                                     | PBS control                          | 12.19 ± 0.24***              | -                                      | 0.0e+00          | 14 <sup>†††</sup>    | 15                   | 17             | 116                            |
| N2; <i>daf-16a</i> (RNAi)           | Ethosuximide (1)                     | 14.35 ± 0.38***              | 17.72%                                 | 2.2e-08          | 17 <sup>†††</sup>    | 20                   | 25             | 118                            |
|                                     | PBS control                          | 15.73 ± 0.33***              | -                                      | 0.0e+00          | 18 <sup>†††</sup>    | 20 <sup>††</sup>     | 22             | 128                            |
| <i>dj-14(ok237)</i>                 | Ethosuximide (1)                     | 15.90 ± 0.33                 | 1.08%                                  | 0.8868           | 18                   | 20                   | 25             | 128                            |
|                                     | PBS control                          | 15.87 ± 0.62                 | -                                      | -                | 18                   | 21                   | 23             | 56                             |
|                                     | Juglone (40 μM)                      | 18.01 ± 0.57*                | 13.48%                                 | 0.0070           | 21                   | 23                   | 25             | 58                             |
|                                     | Succinimide (1)                      | 16.71 ± 0.51                 | 5.29%                                  | 0.3586           | 18                   | 21                   | 25             | 54                             |
|                                     | Ethosuximide (1)                     | 21.56 ± 0.79***              | 35.85%                                 | 1.1e-07          | 21                   | 23                   | 25             | 58                             |
|                                     | PBS control                          | 15.76 ± 0.61                 | -                                      | -                | 17                   | 21                   | 27             | 52                             |
|                                     | Ethosuximide (0.0001)                | 16.66 ± 0.76                 | 5.71%                                  | 0.4174           | 19 <sup>†</sup>      | 23 <sup>†</sup>      | 24             | 52                             |
|                                     | Ethosuximide (0.001)                 | 18.40 ± 0.84*                | 16.75%                                 | 0.0217           | 21 <sup>††</sup>     | 24 <sup>††</sup>     | 26             | 52                             |
|                                     | Ethosuximide (0.01)                  | 16.59 ± 0.60                 | 5.27%                                  | 0.3757           | 19                   | 22                   | 25             | 50                             |
|                                     | Ethosuximide (0.1)                   | 17.46 ± 0.78                 | 10.79%                                 | 0.1722           | 21                   | 25 <sup>†</sup>      | 26             | 53                             |
|                                     | Ethosuximide (0.2)                   | 19.27 ± 0.78**               | 22.27%                                 | 0.0017           | 23 <sup>†</sup>      | 24                   | 29             | 52                             |
|                                     | Ethosuximide (0.5)                   | 20.15 ± 0.98**               | 27.86%                                 | 0.0005           | 24 <sup>††</sup>     | 26 <sup>††</sup>     | 32             | 52                             |
|                                     | Ethosuximide (1)                     | 22.26 ± 1.25***              | 41.24%                                 | 2.6e-06          | 29 <sup>††</sup>     | 32 <sup>†</sup>      | 34             | 112                            |
|                                     | Ethosuximide (2)                     | 21.11 ± 1.21**               | 33.95%                                 | 0.0002           | 26 <sup>††</sup>     | 32 <sup>†</sup>      | 33             | 52                             |
| Ethosuximide (4)                    | 18.73 ± 0.75**                       | 18.85%                       | 0.0038                                 | 22 <sup>††</sup> | 24                   | 26                   | 55             |                                |
| <i>dj-14(ok237); L4440</i> (RNAi)   | PBS control                          | 16.81 ± 0.32***              | -                                      | 3.5e-09          | 20 <sup>†††</sup>    | 22 <sup>†</sup>      | 25             | 118                            |
|                                     | Ethosuximide (1)                     | 21.23 ± 0.44***              | 26.29%                                 | 1.2e-06          | 25 <sup>††</sup>     | 27 <sup>†</sup>      | 31             | 125                            |
| <i>dj-14(ok237); hsp-1</i> (RNAi)   | PBS control                          | 14.16 ± 0.28***              | -                                      | 0.0e+00          | 15 <sup>†††</sup>    | 17 <sup>††</sup>     | 22             | 120                            |
|                                     | Ethosuximide (1)                     | 17.39 ± 0.39***              | 22.81%                                 | 0.0e+00          | 20 <sup>†††</sup>    | 25 <sup>†††</sup>    | 27             | 119                            |
| <i>dj-14(ok237); daf-16a</i> (RNAi) | PBS control                          | 15.37 ± 0.37*                | -                                      | 0.0113           | 18                   | 20                   | 22             | 114                            |
|                                     | Ethosuximide (1)                     | 16.23 ± 0.33                 | 5.60%                                  | 0.1518           | 18                   | 20                   | 22             | 126                            |

| Strains                                                                   | Drug treatments <sup>Δ</sup> (mg/ml) | Mean lifespan ± S.E.M (days) | % Change in mean lifespan <sup>§</sup> | p-value | 75% mortality (days) | 90% mortality (days) | Maximum (days) | Total number of worms analysed |
|---------------------------------------------------------------------------|--------------------------------------|------------------------------|----------------------------------------|---------|----------------------|----------------------|----------------|--------------------------------|
| <i>lin-25(n756)X; juls76[P<sub>unc-25::</sub>GFP + lin-15(+)]</i>         | PBS control                          | 15.28 ± 0.41                 | -                                      | -       | 18                   | 20                   | 22             | 102                            |
|                                                                           | Ethosuximide (0.1)                   | 16.02 ± 0.59                 | 4.84%                                  | 0.1813  | 19                   | 20                   | 22             | 50                             |
|                                                                           | Ethosuximide (0.2)                   | 14.53 ± 0.58                 | -4.91%                                 | 0.5148  | 18                   | 20                   | 22             | 50                             |
|                                                                           | Ethosuximide (0.5)                   | 14.99 ± 0.79                 | -1.90%                                 | 0.8618  | 20                   | 21                   | 22             | 50                             |
|                                                                           | Ethosuximide (1)                     | 14.61 ± 0.65                 | -4.38%                                 | 0.8320  | 18                   | 20                   | 22             | 52                             |
|                                                                           | Ethosuximide (2)                     | 14.56 ± 0.76                 | -4.71%                                 | 0.5504  | 18 <sup>†</sup>      | 19 <sup>†</sup>      | 22             | 52                             |
| <i>bkIs10[P<sub>aex-3::</sub>h4R1N TauV337M + P<sub>myo-2::</sub>GFP]</i> | PBS control                          | 10.94 ± 0.27                 | -                                      | -       | 13                   | 14                   | 16             | 102                            |
|                                                                           | Ethosuximide (0.0001)                | 13.18 ± 0.49**               | 20.48%                                 | 0.0002  | 16                   | 17                   | 20             | 52                             |
|                                                                           | Ethosuximide (0.001)                 | 13.51 ± 0.27***              | 23.49%                                 | 1.1e-06 | 15 <sup>†</sup>      | 16                   | 17             | 52                             |
|                                                                           | Ethosuximide (0.01)                  | 13.80 ± 0.52***              | 26.14%                                 | 5.6e-06 | 15 <sup>†</sup>      | 20                   | 21             | 52                             |
|                                                                           | Ethosuximide (0.1)                   | 13.79 ± 0.36***              | 26.05%                                 | 8.8e-09 | 16 <sup>††</sup>     | 18 <sup>†</sup>      | 20             | 102                            |
|                                                                           | Ethosuximide (0.2)                   | 14.04 ± 0.36***              | 28.34%                                 | 2.4e-09 | 16 <sup>††</sup>     | 17 <sup>†</sup>      | 20             | 102                            |
|                                                                           | Ethosuximide (0.5)                   | 13.76 ± 0.34***              | 25.78%                                 | 5.6e-09 | 15 <sup>††</sup>     | 16 <sup>†</sup>      | 19             | 102                            |
|                                                                           | Ethosuximide (1)                     | 14.17 ± 0.37***              | 29.52%                                 | 0.0e+00 | 16 <sup>††</sup>     | 19                   | 20             | 102                            |
|                                                                           | Ethosuximide (2)                     | 15.50 ± 0.40***              | 41.68%                                 | 0.0e+00 | 18 <sup>††</sup>     | 20 <sup>†</sup>      | 21             | 102                            |
|                                                                           | PBS control                          | 11.28 ± 0.30                 | -                                      | -       | 13                   | 14                   | 17             | 92                             |
|                                                                           | PBS control + Kanamycin              | 15.50 ± 0.46***              | 37.41%                                 | 0.0e+00 | 17 <sup>††</sup>     | 19 <sup>†</sup>      | 25             | 81                             |
|                                                                           | Ethosuximide (1)                     | 16.71 ± 0.51***              | 48.14%                                 | 0.0e+00 | 21                   | 23                   | 25             | 80                             |
|                                                                           | Ethosuximide (1) + Kanamycin         | 19.41 ± 0.60***              | 72.07%                                 | 0.0e+00 | 23                   | 25                   | 29             | 80                             |
| <i>cca-1(ad1650)</i>                                                      | PBS control                          | 17.50 ± 0.55                 | -                                      | -       | 21                   | 24                   | 27             | 108                            |
|                                                                           | Ethosuximide (1)                     | 17.82 ± 0.57                 | 1.83%                                  | 0.5423  | 21                   | 26                   | 27             | 107                            |
| <i>bkIs10[P<sub>aex-3::</sub>h4R1N TauV337M + P<sub>myo-2::</sub>GFP]</i> | PBS control                          | 11.45 ± 0.33                 | -                                      | -       | 14                   | 15                   | 17             | 116                            |
|                                                                           | Ethosuximide (1)                     | 14.80 ± 0.43***              | 29.26%                                 | 6.5e-09 | 17 <sup>††</sup>     | 19 <sup>†</sup>      | 22             | 116                            |
| CK10; <i>cca-1(ad1650)</i>                                                | PBS control                          | 11.27 ± 0.31                 | -                                      | -       | 14                   | 15                   | 19             | 114                            |
|                                                                           | Ethosuximide (1)                     | 14.27 ± 0.35***              | 26.62%                                 | 2.2e-09 | 16                   | 17 <sup>††</sup>     | 23             | 112                            |

**Table S1: Statistical analysis of lifespan extension in *C. elegans*.** Adult mean lifespan  $\pm$  SEM in days observed in lifespan analysis. The strains and concentrations of the drugs tested were indicated. Lifespan experiments were carried out at 20°C. Online Application for the Survival Analysis of Lifespan Assays (OASIS; <http://sbi.postech.ac.kr/oasis/introduction/>) (Yang *et al.*, 2011) was used for statistical analysis and to determine means and percentiles. Mean lifespans were compared using the log-rank (Mantel-Cox) test (\* $p < 0.05$ ; \*\* $p < 0.005$ ; \*\*\* $p < 0.0001$ ), and mortality at more specific time points was compared using Fisher's exact test (<sup>†</sup> $p < 0.05$  <sup>††</sup> $p < 0.005$ ; <sup>†††</sup> $p < 0.0001$ ).  $\Delta$ Drug treatments were from conception until death. PBS was used to solubilise ethosuximide, and PBS alone was the control treatment for ethosuximide. For the antibiotic kanamycin treatment of OP50 *E.coli*, 80  $\mu$ l of 10 mM kanamycin solubilised by water was added after 24 hours of bacterial growth as described, kanamycin alone was the control treatment for kanamycin + ethosuximide combined treatment. §The percentage change and the statistical significance of this change were determined by comparing the experimental ethosuximide treatments to PBS control. The experimental treatment kanamycin + ethosuximide was compared to kanamycin.
