# Supplementary material for: Ethosuximide ameliorates neurodegenerative disease phenotypes by modulating DAF-16/FOXO target gene expression
Source: Springer Nature journal article supplement (doi:10.1186/s13024-015-0046-3), 2015-09-29
Supplement: MOESM3 [file 9776494]

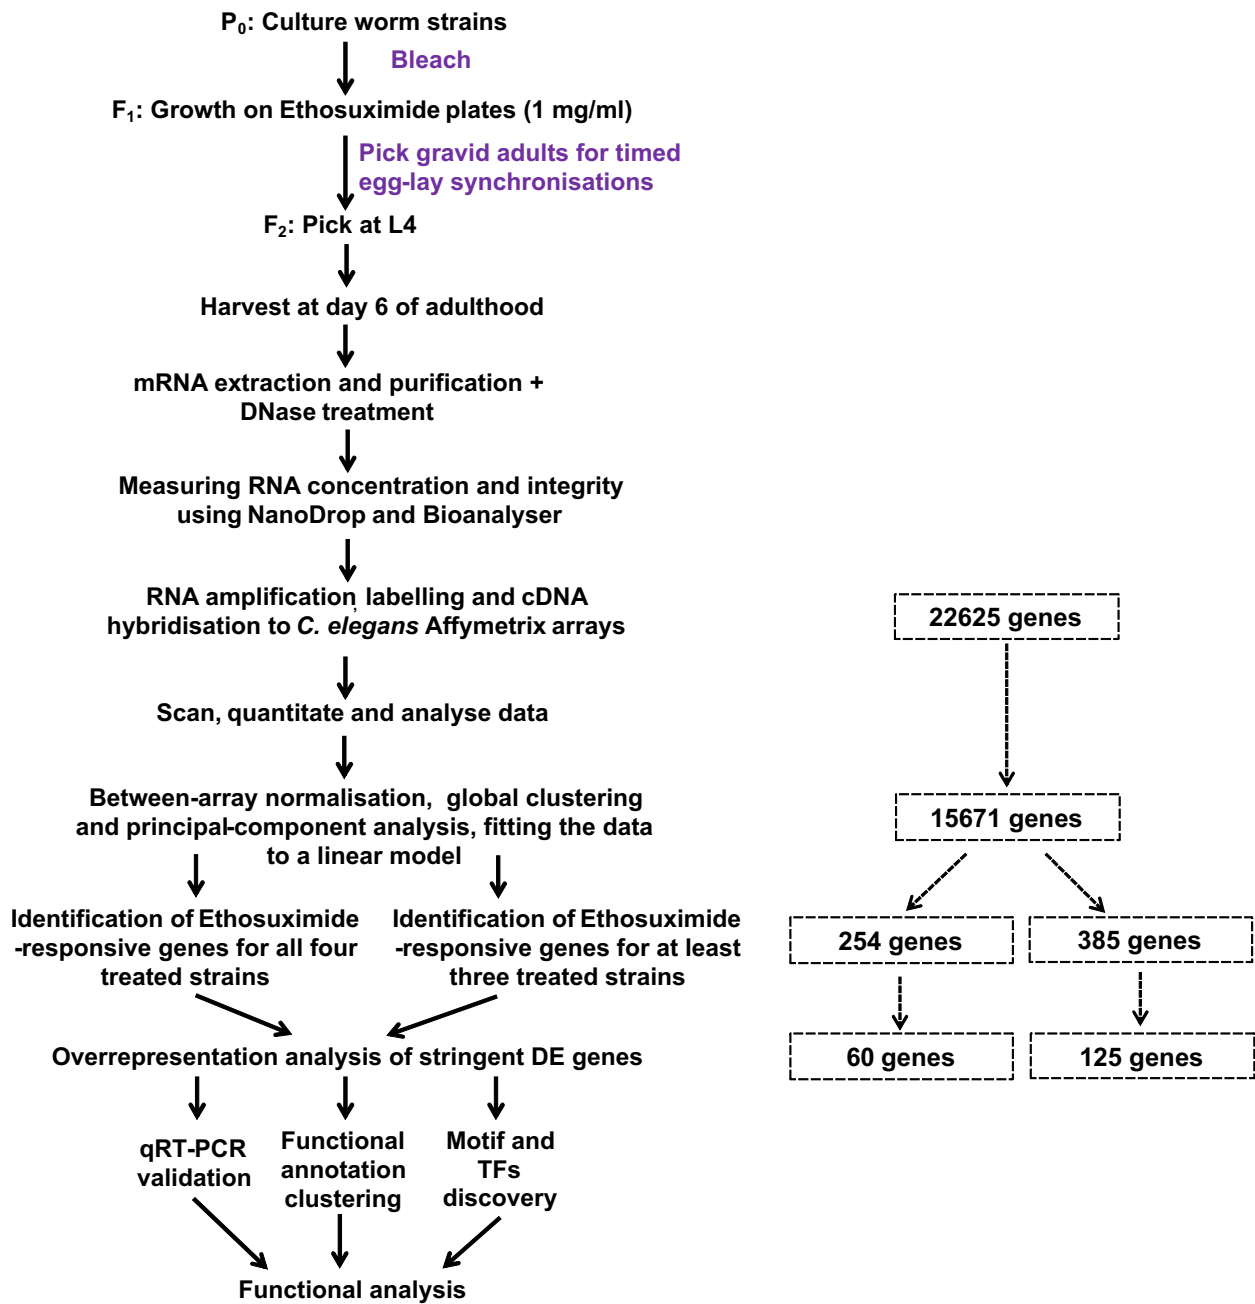

Figure S2. Transcriptomics workflow.
