# Supplementary material for: Ethosuximide ameliorates neurodegenerative disease phenotypes by modulating DAF-16/FOXO target gene expression
Source: Springer Nature journal article supplement (doi:10.1186/s13024-015-0046-3), 2015-09-29
Supplement: MOESM6 [file 9776494]

**a**

| Functional clustering of up-regulated proteins |                  |
|------------------------------------------------|------------------|
| Cluster                                        | Enrichment score |
| Oxidation reduction                            | 5.45             |
| Lipid metabolism                               | 4.23             |
| NAD binding and reduction                      | 4.10             |
| Longevity/ageing                               | 3.13             |

  

| Functional clustering of down-regulated proteins |                  |
|--------------------------------------------------|------------------|
| Cluster                                          | Enrichment score |
| Chromatin remodeling                             | 4.29             |

**b**

|                    | Gene Ontology Term                                     | Fold enrichment for common DEGs |
|--------------------|--------------------------------------------------------|---------------------------------|
| Biological Process | GO:0055114~oxidation reduction                         | 8.3                             |
|                    | GO:0030258~lipid modification                          | 21.2                            |
|                    | GO:0030259~lipid glycosylation                         | 24.1                            |
|                    | GO:0008340~determination of adult life span            | 6.1                             |
|                    | GO:0006333~chromatin assembly or disassembly           | 41.5                            |
|                    | GO:0006334~nucleosome assembly                         | 58.3                            |
|                    | GO:0065004~protein-DNA complex assembly                | 50.4                            |
|                    | GO:0006323~DNA packaging                               | 44.4                            |
|                    | GO:0051276~chromosome organisation                     | 15.9                            |
|                    | GO:0043933~macromolecular complex subunit organisation | 15.4                            |
| Cellular Component | GO:0000785~chromatin                                   | 39.2                            |
|                    | GO:0032993~protein-DNA complex                         | 54.5                            |
|                    | GO:0005694~chromosome                                  | 19.3                            |
| Molecular Function | GO:0009055~electron carrier activity                   | 10.5                            |
|                    | GO:0046906~tetrapyrrole binding                        | 11.7                            |
|                    | GO:0005506~iron ion binding                            | 7.4                             |
| Protein Domain     | IPR017973:cytochrome P450, C-terminal region           | 28.3                            |
|                    | IPR002213:UDP-glucuronosyl/UDP-glucosyltransferase     | 22.4                            |
|                    | IPR002347:glucose/ribitol dehydrogenase                | 26.7                            |
|                    | IPR002198:short-chain dehydrogenase/reductase SDR      | 20.2                            |
|                    | IPR016040:NAD(P)-binding domain                        | 12.2                            |

**c**

| Publication Enrichment                                                                           | p-Value  | Matches |
|--------------------------------------------------------------------------------------------------|----------|---------|
| Genes that act downstream of DAF-16 to influence the lifespan of <i>Caenorhabditis elegans</i> . | 9.96E-05 | 6       |

**Figure S4. Functional enrichment analysis of common DEGs.**

(A) Functional clustering of DEGs that are commonly regulated after ethosuximide treatment. The reported enrichment score was calculated by DAVID according to the Fisher exact score of each clustered term. Only clusters that consisted of 4 or more genes with an enrichment score higher than 1.3 were considered significant and included in the final list of overrepresented GO categories. (B) The fold enrichment for common DEGs in relation to the overall count in significantly enriched GO terms is shown (red = up-regulated, green = down-regulated genes)

(C) modMine publication analysis revealed an enrichment in DAF-16/FOXO regulated genes.
