# Supplementary material for: Ethosuximide ameliorates neurodegenerative disease phenotypes by modulating DAF-16/FOXO target gene expression
Source: Springer Nature journal article supplement (doi:10.1186/s13024-015-0046-3), 2015-09-29
Supplement: MOESM7 [file 9776494]

| Sequence  | Gene                   | Gene name                                        | Human orthologue            |          |
|-----------|------------------------|--------------------------------------------------|-----------------------------|----------|
| T08B1.3   | <i>alh-5</i>           | ALdehyde deHydrogenase                           | ALDH3A2                     |          |
| C30G12.2  | C30G12.2               | C30G12.2                                         |                             |          |
| K09A11.4  | <i>cyp-14A3</i>        | CYtochrome P450 family                           | CYP2A7P1, CYP2J2            |          |
| T10H4.11  | <i>cyp-34A2</i>        |                                                  | CYP2A7P1                    |          |
| B0213.15  | <i>cyp-34A9/dod-16</i> |                                                  | CYP2A7P2                    |          |
| K07C6.4   | <i>cyp-35B1/dod-13</i> |                                                  | CYP2A7P3                    |          |
| C06B3.3   | <i>cyp-35C1</i>        |                                                  | CYP2A7P4                    |          |
| C12D5.7   | <i>cyp-33A1</i>        |                                                  | CYP2J2                      |          |
| C03G6.15  | <i>cyp-35A2</i>        |                                                  | CYP2A7P1                    |          |
| K09D9.2   | <i>cyp-35A3</i>        |                                                  |                             |          |
| F55A12.4  | <i>dhs-2</i>           |                                                  | DeHydrogenases, Short chain | HSD17B6  |
| R08H2.1   | <i>dhs-23</i>          |                                                  |                             | HSD17B14 |
| ZK816.5   | <i>dhs-26</i>          | DHRS1                                            |                             |          |
| F25D1.5   | <i>F25D1.5</i>         |                                                  |                             |          |
| F08A8.2   | <i>F08A8.2</i>         | F08A8.2                                          | ACOX1                       |          |
| C24B9.9   | <i>dod-3</i>           | Downstream Of DAF-16 (regulated by DAF-16)       |                             |          |
| T20G5.7   | <i>dod-6</i>           |                                                  |                             |          |
| H23N18.2  | <i>ugt-14</i>          | UDP- GlucuronosylTransferase                     | UGT3A2, UGT3A1              |          |
| C10H11.3  | <i>ugt-25</i>          |                                                  |                             |          |
| F10D2.11  | <i>ugt-41</i>          |                                                  |                             |          |
| H23N18.3  | <i>ugt-8</i>           |                                                  |                             |          |
| C03A7.11  | <i>ugt-51</i>          |                                                  |                             |          |
| C23G10.6  | <i>C23G10.6</i>        |                                                  |                             |          |
| C54F6.14  | <i>ftn-1</i>           | FerriTiN                                         | FTH1                        |          |
| F28D1.3   | <i>thn-1</i>           | THaumatIN family                                 |                             |          |
| T07C4.4   | <i>spp-1</i>           | SaPosin-like Protein family                      |                             |          |
| Y55B1BR.3 | <i>Y55B1BR.3</i>       | Y55B1BR.3                                        |                             |          |
| C33E10.1  | C33E10.1               | C33E10.1                                         |                             |          |
| C39B5.2   | C39B5.2                | C39B5.2                                          |                             |          |
| F45C12.5  | <i>fbxb-11</i>         | F-box B protein                                  |                             |          |
| M01D1.8   | <i>fbxb-41</i>         |                                                  |                             |          |
| F55C9.13  | <i>fbxb-63</i>         |                                                  |                             |          |
| Y40B1B.3  | <i>fbxb-66</i>         |                                                  |                             |          |
| Y73B6BL.9 | <i>hil-2</i>           | Hlstone H1 Like                                  | HIST1H1A                    |          |
| F22F1.1   | <i>hil-3</i>           |                                                  |                             |          |
| C01B10.5  | <i>hil-7</i>           |                                                  |                             |          |
| M163.3    | <i>his-24</i>          | HlStone                                          |                             |          |
| F45F2.12  | <i>his-8</i>           |                                                  | HIST1H2BL                   |          |
| C14F5.1   | <i>dct-1</i>           | DAF-16/FOXO Controlled, germline Tumor affecting | BNIP3                       |          |

**Figure S5. DEGs derived from highly enriched functional clusters.**

Red shading denotes increased expression, and green shading denotes decreased expression relative to untreated group.
