# Supplementary material for: Ethosuximide ameliorates neurodegenerative disease phenotypes by modulating DAF-16/FOXO target gene expression
Source: Springer Nature journal article supplement (doi:10.1186/s13024-015-0046-3), 2015-09-29
Supplement: MOESM8 [file 9776494]

| Motif                                   | Logo      |                   | Occurrences           |                          | Other algorithms that identified the regulatory element |               |       |
|-----------------------------------------|-----------|-------------------|-----------------------|--------------------------|---------------------------------------------------------|---------------|-------|
|                                         | Consensus | Reverse consensus | Three treated strains | All four treated strains | MEME-DREME                                              | BioProspector | SCOPE |
| DAF-16 Associated Element (DAE) CTTATCA |           |                   | 19%                   | 24%                      | ✓                                                       | ✓             | ✓     |
|                                         |           |                   | 25%                   | 25%                      | ✓                                                       | ✓             | ✓     |
|                                         |           |                   | 15%                   | -                        | ✗                                                       | ✓             | ✗     |
| TATA box GTATA(T/A)(T/A)AG              |           |                   | 22%                   | 12%                      | ✓                                                       | ✗             | ✓     |
|                                         |           |                   | 12%                   | -                        | ✗                                                       | ✗             | ✗     |
| ?                                       |           |                   | -                     | 15%                      | ✗                                                       | ✗             | ✗     |

**Figure S6. Ethosuximide-responsive genes are enriched for a DAF-16 Associated Element (DAE) motif.** To identify candidate regulatory sequence motifs for ethosuximide-responsive genes, 200 bp upstream regions for each of promoter sequences of common DEGs were mined for overrepresented motifs using the ‘oligo-analysis’ and ‘peak-motifs analysis’ option of RSAT web server. Repeat analyses were also performed using multiple motif analysing packages. Table shows overrepresented consensus motifs found by RSAT peak-motifs analysis containing a graphic representation of the motifs identified and their reverse complements, along with the extent of agreement with BioProspector, MEME and SCOPE packages.
