# Supplementary material for: Ethosuximide ameliorates neurodegenerative disease phenotypes by modulating DAF-16/FOXO target gene expression
Source: Springer Nature journal article supplement (doi:10.1186/s13024-015-0046-3), 2015-09-29
Supplement: MOESM9 [file 9776494]

**a**

| Triply regulated |        |          |                            | Quadruply regulated |          |                                |
|------------------|--------|----------|----------------------------|---------------------|----------|--------------------------------|
| Rank             | Weight | PubMedID | Tag(s)                     | Weight              | PubMedID | Tag(s)                         |
| 1                | 3.60%  | 18778409 | Ageing                     | 3.20%               | 18778409 | Ageing                         |
| 2                | 1.60%  | 21589891 | Germline                   | 3.00%               | 21931806 | Chemical stimulus              |
| 3                | 1.60%  | 23352664 | Lifespan                   | 2.40%               | 23300685 | Oxidative stress, lifespan     |
| 4                | 1.60%  | 21931806 | Chemical stimulus          | 1.90%               | 20798549 | Metabolism                     |
| 5                | 1.50%  | 20798549 | Metabolism                 | 1.70%               | 22560298 | Gene expression                |
| 6                | 1.50%  | 19745112 | Gene expression            | 1.70%               | 20816092 | Insulin-like signaling, stress |
| 7                | 1.40%  | 15772128 | Development                | 1.60%               | 19379696 | Germline immortality           |
| 8                | 1.40%  | 21765926 | Stress hormesis            | 1.60%               | 22083954 | Innate immunity                |
| 9                | 1.30%  | 21363964 | Dosage compensation        | 1.50%               | 21363964 | Dosage compensation            |
| 10               | 1.20%  | 23300685 | Oxidative stress, lifespan | 1.10%               | 21723504 | Lifespan, stress response      |

**b**

|                              | Gene Array                                                       | Triply regulated |      | Quadruply regulated |      |
|------------------------------|------------------------------------------------------------------|------------------|------|---------------------|------|
|                              |                                                                  | Up               | Down | Up                  | Down |
| Longevity mutants and dauers | <i>daf-2</i> pathway targets                                     | 14%              |      | 8%                  |      |
|                              | <i>daf-16</i> pathway targets                                    | 6%               | 4%   | 5%                  | 2%   |
|                              | Age-regulated genes                                              | 3%               |      | 2%                  |      |
|                              | Shared dauer and insulin pathway targets                         | 1%               | 0%   | 1%                  | 0%   |
|                              | Most responsive <i>daf-16</i> regulated genes                    | 16%              | 6%   | 14%                 | 2%   |
| Food deprivation             | Genes in response to fasting                                     | 0%               | 11%  | 0%                  | 11%  |
|                              | Starvation (dietary restriction)                                 | 4%               |      | 3%                  |      |
| Stress                       | <i>skn-1</i> pathway targets                                     | 0%               |      | 0%                  |      |
|                              | Hyperbaric oxygen stress (oxidative stress)                      | 1%               | 0%   | 1%                  | 0%   |
|                              | Commonly regulated in oxidative stress and aging                 | 4%               | 0%   | 4%                  | 0%   |
|                              | Commonly regulated in oxidative stress and <i>daf-16</i>         | 8%               | 0%   | 7%                  | 0%   |
| Polyphenolic action          | Commonly regulated in stress, aging, and <i>daf-16</i>           | 4%               | 0%   | 10%                 | 0%   |
|                              | 1 mM Resveratrol regulated genes                                 | 1%               |      | 1%                  |      |
|                              | 200 μM Quercetin regulated genes                                 | 2%               |      | 1%                  |      |
| Immune response              | 300 μM Tannic acid regulated genes                               | 0%               |      | 0%                  |      |
|                              | Immune effector genes                                            | 15%              |      | 4%                  |      |
| Toxin                        | <i>daf-2</i> pathway and <i>Pseudomonas aeruginosa</i> infection | 2%               |      | 2%                  |      |
|                              | Genes in response to cadmium toxicity                            | 6%               | 6%   | 5%                  | 4%   |

**c**

| Lack of enrichment of known detoxification enzymes |                   |       |       |                                |                      |                       |
|----------------------------------------------------|-------------------|-------|-------|--------------------------------|----------------------|-----------------------|
| Enzyme                                             | Total # in Genome | Abbr. | N2 WT | <i>P<sub>unc-25::GFP</sub></i> | <i>daf-14(ok237)</i> | <i>daf-14(tm3223)</i> |
| Cytochrome P450                                    | 75                | cyp   | 8     | 12                             | 17                   | 12                    |
| UDP-glucuronosyl/glucosyl transferase              | 72                | ugt   | 7     | 8                              | 15                   | 12                    |
| Glutathione peroxidase                             | 8                 | gpx   | 0     | 0                              | 0                    | 0                     |
| Glutathione S-transferase                          | 57                | gst   | 1     | 5                              | 5                    | 3                     |
| Superoxide dismutase                               | 5                 | sod   | 0     | 0                              | 1                    | 0                     |
| Thioredoxin                                        | 5                 | trx   | 1     | 1                              | 1                    | 0                     |
| Thioredoxin reductase                              | 2                 | trxr  | 0     | 0                              | 0                    | 0                     |
| Catalase                                           | 3                 | ctl   | 0     | 0                              | 0                    | 0                     |
| Peroxisome oxidin                                  | 3                 | prdx  | 0     | 0                              | 0                    | 0                     |
| Sestrin                                            | 1                 | sesn  | 0     | 0                              | 0                    | 0                     |
| Isocitrate dehydrogenase                           | 2                 | idh   | 0     | 0                              | 0                    | 0                     |
| Glutaredoxin                                       | 5                 | glrx  | 0     | 0                              | 0                    | 0                     |
| Ferritin                                           | 2                 | ftn   | 1     | 1                              | 1                    | 1                     |

**Figure S7. Data set associations.** (A) Top ten data set associations for stringent common DEGs queried using the SPELL search engine. Gene expression data sets and their associated PubMed ID, tags and weight are indicated. (B) Manual comparisons of gene expression patterns of relevant gene clusters or transcriptional profiles in the literature to findings in this study. Only a small proportion of common DEGs overlap with expression profiles of various stress conditions. (C) Lack of enrichment of known detoxification enzymes in response to ethosuximide treatment.
