# Supplementary material for: Ethosuximide ameliorates neurodegenerative disease phenotypes by modulating DAF-16/FOXO target gene expression
Source: Springer Nature journal article supplement (doi:10.1186/s13024-015-0046-3), 2015-09-29
Supplement: MOESM10 [file 9776494]

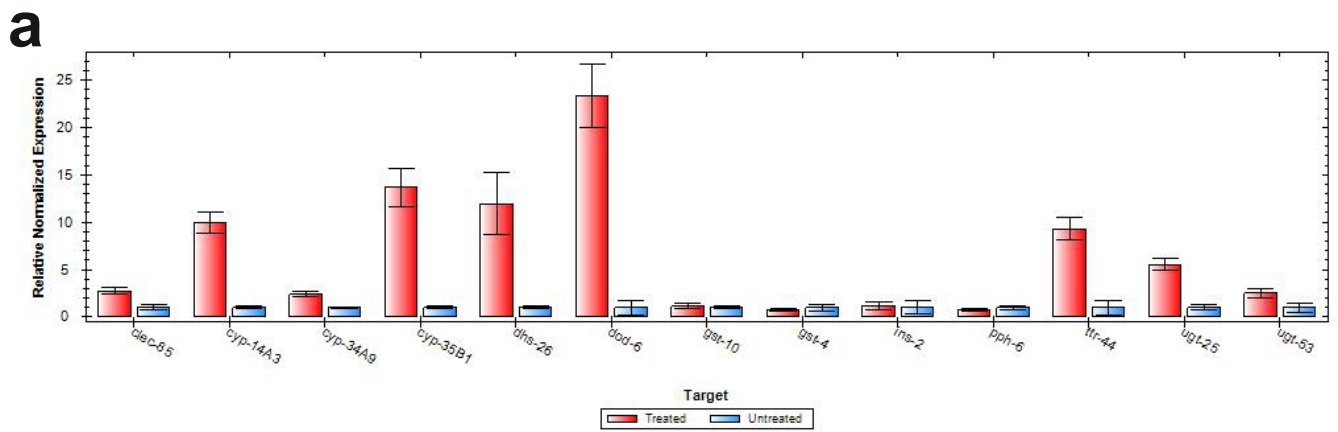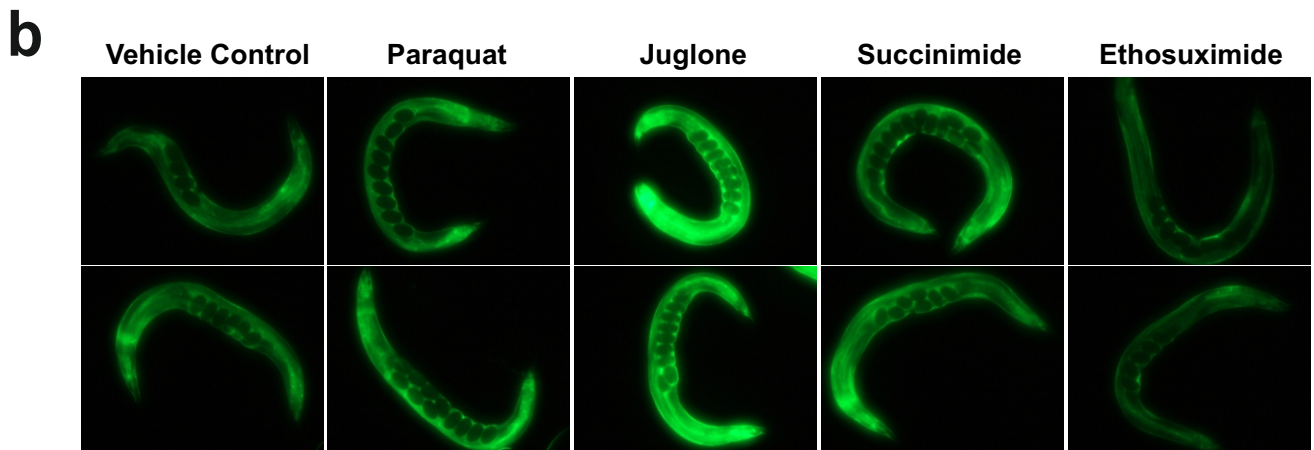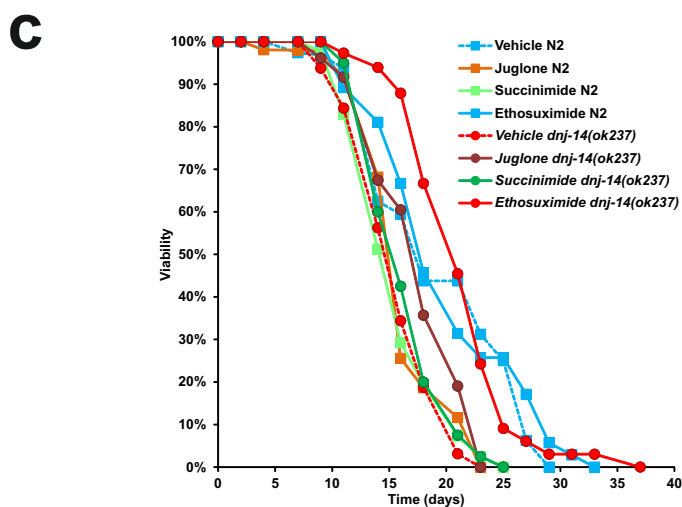

**Figure S8. Ethosuximide does not induce general stress and hormesis.**

(A) qRT-PCR analysis of the stress response genes *gst-4* and *gst-10* showed no evidence of induction by ethosuximide (B) Ethosuximide does not promote activation of an oxidative stress-responsive gene reporter. Young adult N2 worms carrying a  $P_{gst-4}::GFP$  transgene were exposed to various treatments and observed for transgene expression by fluorescence microscopy. Note the lack of  $P_{gst-4}::GFP$  induction following ethosuximide exposure in comparison to the oxidative stressors juglone and paraquat (positive transgene induction controls). (C) Lifespan increase by ethosuximide in *dnj-14* mutants is not mimicked by hormetic compounds or the non-therapeutic compound, succinimide.
