# Supplementary material for: Ethosuximide ameliorates neurodegenerative disease phenotypes by modulating DAF-16/FOXO target gene expression
Source: Springer Nature journal article supplement (doi:10.1186/s13024-015-0046-3), 2015-09-29
Supplement: MOESM12 [file 9776494]

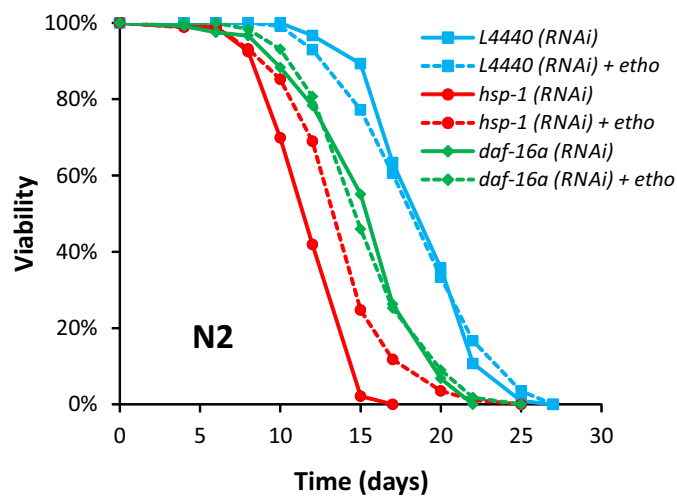

### Figure 10. Ethosuximide action is independent of *hsp-1*.

Survival curves of wild type N2 worms grown on *E. coli* containing empty vector (L4440), *hsp-1* or *daf-16* dsRNA-producing plasmids in the presence (dashed lines) or absence (solid lines) of 1 mg/ml ethosuximide. RNAi of *hsp-1* and *daf-16* reduced lifespan compared to the vector control. Although ethosuximide treatment significantly increased the lifespan of worms on *hsp-1* RNAi ( $p < 0.001$ ), it had no significant effect on vector control or *daf-16* RNAi worms ( $p > 0.15$ ) ( $n > 100$  worms per strain/condition).
