# Supplementary material for: Ethosuximide ameliorates neurodegenerative disease phenotypes by modulating DAF-16/FOXO target gene expression
Source: Springer Nature journal article supplement (doi:10.1186/s13024-015-0046-3), 2015-09-29
Supplement: MOESM14 [file 9776494]

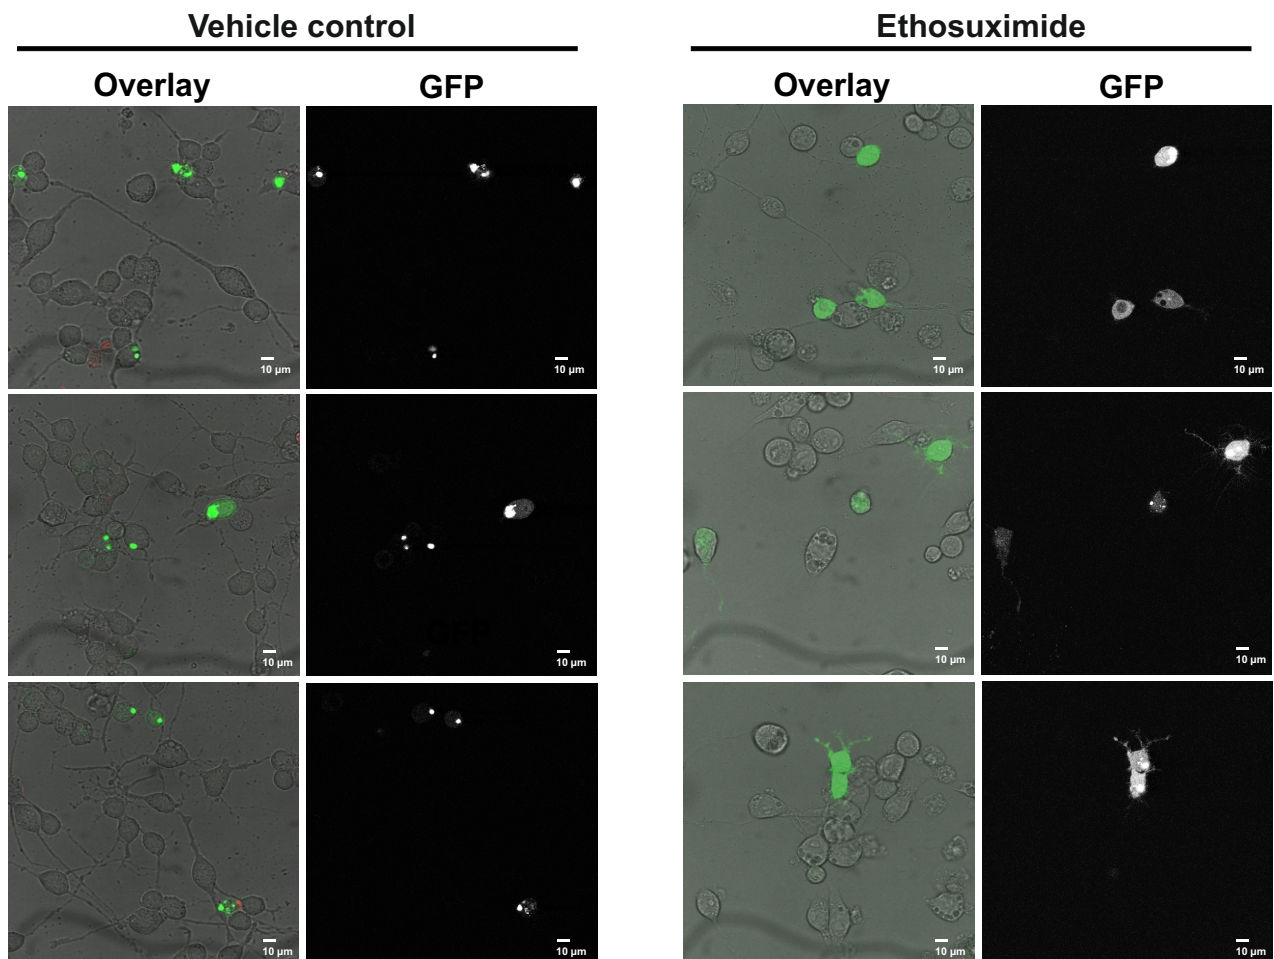

**Figure S12. Ethosuximide reduces polyglutamine protein aggregation in mammalian neurons.** Visualisation of the effect of 1mg/ml ethosuximide on polyQ97-EGFP aggregation in N2A cells in comparison to vehicle control. All cells were imaged 72 hours post-transfection. Phase contrast, GFP (green) and SYTOX orange staining (red, to identify dead cells) images are overlaid on the left panel, with GFP shown on the right panel. Scale bar = 10μm.
