# Supplementary material for: Ethosuximide ameliorates neurodegenerative disease phenotypes by modulating DAF-16/FOXO target gene expression
Source: Springer Nature journal article supplement (doi:10.1186/s13024-015-0046-3), 2015-09-29
Supplement: MOESM15 [file 9776494]

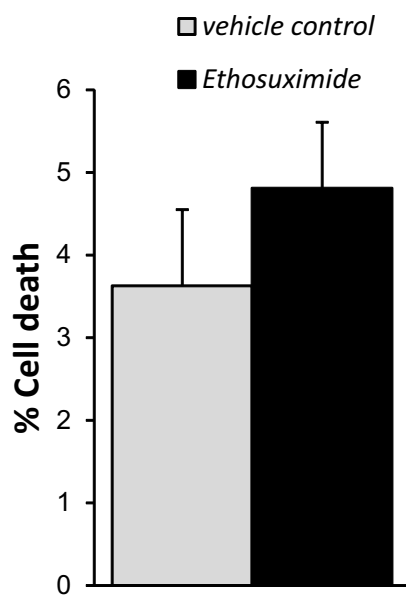

**Figure S13. Ethosuximide has no significant effect on cytotoxicity in mammalian neurons.**

The number of SYTOX orange-stained (dead) cells present 72 hours post-transfection was counted manually and expressed as the percentage of the total number of cells in each microscope field examined. Over 800 cells were counted from three independent experiments.

No significant difference was observed between the percentage of dead cells present in cultures incubated with vehicle control or 1mg/ml ethosuximide.
