# Supplementary material for: Ethosuximide ameliorates neurodegenerative disease phenotypes by modulating DAF-16/FOXO target gene expression
Source: Springer Nature journal article supplement (doi:10.1186/s13024-015-0046-3), 2015-09-29
Supplement: MOESM18 [file 9776494]

| Oligo Name                   | Sequence 5' to 3'                       | Amplicon Size (bp)             | Purpose                                    |
|------------------------------|-----------------------------------------|--------------------------------|--------------------------------------------|
| <b>Nematode</b>              |                                         |                                |                                            |
| <i>pmp-3</i> F               | TGGTGTTCGCGATTACTGTAG                   | 283                            | qRT-PCR                                    |
| <i>pmp-3</i> R               | GATTTGTTGTTCGCGAGAGTGG                  |                                |                                            |
| <i>act-1</i> F               | CTACGAACTTCCTGACGGACAAG                 | 102                            | qRT-PCR                                    |
| <i>act-1</i> R               | CCGGCCGACTCCATACC                       |                                |                                            |
| <i>cyp-34A9</i> F            | CGAGACTCTTGCCGTAGACC                    | 149                            | qRT-PCR                                    |
| <i>cyp-34A9</i> R            | TTCCACCGGTAACCTCTGTC                    |                                |                                            |
| <i>cyp-34A9</i> F            | TAACCGATAGGCCAAAGACG                    | 281                            | qRT-PCR                                    |
| <i>cyp-34A9</i> R            | ACAAGATCTCTCCCGATGC                     |                                |                                            |
| <i>cyp-35B1</i> F            | CAAAGATGGAGCAGGAGAGG                    | 131                            | qRT-PCR                                    |
| <i>cyp-35B1</i> R            | ATTGAATCCTGCGACCAAAG                    |                                |                                            |
| <i>cyp-14A3</i> F            | CAAAGGACCGTTACCATTGC                    | 283                            | qRT-PCR                                    |
| <i>cyp-14A3</i> R            | TTGAAGCCTCCAGTTGTCTC                    |                                |                                            |
| <i>ugt-25</i> F              | ATGACTCACGGAGGTCTTGG                    | 108                            | qRT-PCR                                    |
| <i>ugt-25</i> R              | TGCAAGCATATTCGCATTTTC                   |                                |                                            |
| <i>gst-4</i> F               | TGCTCAATGTGCCTTACGAG                    | 173                            | qRT-PCR                                    |
| <i>gst-4</i> R               | AGTTTTTCCAGCGAGTCCAA                    |                                |                                            |
| <i>gst-10</i> F              | AAGAGATTGTGCAGACTGGAG                   | 99                             | qRT-PCR                                    |
| <i>gst-10</i> R              | AGAACATGTTCGAGGAAGGTTG                  |                                |                                            |
| <i>clec-85</i> F             | CCTGATGATAAGTATATTGGAGACCTGT<br>GCTACTC | 94                             | qRT-PCR                                    |
| <i>clec-85</i> R             | GGTTTTGGCTGTAGCACGCCGACTGAGC<br>ATCC    |                                |                                            |
| <i>ttr-44</i> F              | GACGTCTGATCTGTGGAGAC                    | 301                            | qRT-PCR                                    |
| <i>ttr-44</i> R              | TCCAGGTTGAGAACTCCAAAG                   |                                |                                            |
| <i>dhs-26</i> F              | AACATCTGCAGGATCTTGGG                    | 297                            | qRT-PCR                                    |
| <i>dhs-26</i> R              | CACAAAGTGATTGCCCATCC                    |                                |                                            |
| <i>dod-6</i> F               | TCCTCGTCATCATGTCTGTC                    | 148                            | qRT-PCR                                    |
| <i>dod-6</i> R               | CACTTCCGCAAGTCTTTGG                     |                                |                                            |
| <i>ugt-53</i> F              | AACTTCCCTTTACCCGAAC                     | 276                            | qRT-PCR                                    |
| <i>ugt-53</i> R              | TGTTTCGCTTTACGAATCGC                    |                                |                                            |
| <i>ins-2</i> F               | TCTGTCTCCTTCTTCACTG                     | 203                            | qRT-PCR                                    |
| <i>ins-2</i> R               | ACATTCTCCACATGTTGCAAGC                  |                                |                                            |
| <i>pph-6</i> F               | ACATGGAGGACTTTACCTG                     | 307                            | qRT-PCR                                    |
| <i>pph-6</i> R               | ATAGCAGTAGTTTGGAGCCG                    |                                |                                            |
| <i>dnj-14 (ok237)</i> Full F | GAAAATTGGTGATGATGCTGCAGG                | WT 2590,<br><i>ok237</i> 361   | <i>ok237</i><br>genotyping<br>PCR          |
| <i>dnj-14 (ok237)</i> Mid F  | CGCCAATATCTCCAGTCTCCAATG                | WT 1736,<br><i>ok237</i> none  |                                            |
| <i>dnj-14(ok237)</i> R       | GTCTCCAGAGGCAGTCAACAAC                  |                                |                                            |
| <i>cca-1(ad1650)</i> Avery F | CCGCAATTTGCCCTCCACAT                    | WT 3310,<br><i>ad1650</i> 930  | <i>ad1650</i><br>genotyping<br>PCR         |
| <i>cca-1(ad1650)</i> Avery R | ATGAGGATGGCGAAGAGGACC                   |                                |                                            |
| <i>cca-1(ad1650)</i> F       | CGGAAATATTAAGTGCATTCTGGA                | WT 1350,<br><i>ad1650</i> none | <i>ad1650</i><br>homozygotes<br>genotyping |
| <i>cca-1(ad1650)</i> R       | CGTGCCCTTACAACCGAACTG                   |                                |                                            |

| Oligo Name   | Sequence 5' to 3'       | Amplicon Size (bp) | Purpose        |
|--------------|-------------------------|--------------------|----------------|
| Tau F        | CAAGCTCGCATGGTCAGTAA    | 425                | Tau genotyping |
| Tau R        | TTCTCAGTGGAGCCGATCTT    |                    |                |
| <b>Mouse</b> |                         |                    |                |
| Ccng2 F      | AGGGGTTTCAGCTTTTCGGATT  | 112                | qRT-PCR        |
| Ccng2 R      | AGTGTTATCATTCTCCGGGGTAG |                    |                |
| Cdkn1a F     | CCTGGTGATGTCCGACCTG     | 103                | qRT-PCR        |
| Cdkn1a R     | CCATGAGCGCATCGCAATC     |                    |                |
| Cdkn1b F     | TCAAACGTGAGAGTGTCTAACG  | 103                | qRT-PCR        |
| Cdkn1b R     | CCGGGCCGAAGAGATTTCTG    |                    |                |
| Gadd45a F    | AGACCCCGATAACGTGGTACT   | 318                | qRT-PCR        |
| Gadd45a R    | TGATCCATGTAGCGACTTTCC   |                    |                |
| Sod2 F       | CAGACCTGCCTTACGACTATGG  | 113                | qRT-PCR        |
| Sod2 R       | CTCGGTGGCGTTGAGATTGTT   |                    |                |
| Rbl2 F       | AACTTCCCCATGATTAGCGATG  | 97                 | qRT-PCR        |
| Rbl2 R       | GGTTAGAACACTGAAGGGCATT  |                    |                |
| Cat F        | GCGTCCAGTGCCTGTAGA      | 199                | qRT-PCR        |
| Cat R        | TCAGGGTGGACGTCAGTGAA    |                    |                |
| Eif4ebp1 F   | GGGGACTACAGCACCCTC      | 171                | qRT-PCR        |
| Eif4ebp1 R   | CTCATCGCTGGTAGGGCTA     |                    |                |
| Bcl2l11 F    | CCCGGAGATACGGATTGCAC    | 96                 | qRT-PCR        |
| Bcl2l11 R    | GCCTCGCGGTAATCATTGTC    |                    |                |
| Gapdh F      | AGGTCGGTGTGAACGGATTTG   | 123                | qRT-PCR        |
| Gapdh R      | TGTAGACCATGTAGTTGAGGTCA |                    |                |
| Actb F       | GGCTGTATTCCCCTCCATCG    | 154                | qRT-PCR        |
| Actb R       | CCAGTTGGTAACAATGCCATGT  |                    |                |

**Table S3: Sequences of oligonucleotides used in this study**
